# Supplementary material
Source: PubMed Central journal article supplement (PMC4794362)
Supplement: NIHMS750719-supplement-1.pdf [file NIHMS750719-supplement-1.pdf]

## Supplementary Information

### Supplemental Figure Legends:

**Supplemental Figure 1.** (A) Taqman qPCR analysis of miR-31 expression in RNA isolated from isogenic HCT116 cell lines with oncogenic KRAS (mut/null) or with wild-type KRAS (wt/null). (B) qPCR analysis of *KRAS* expression in the indicated cell lines transfected with siRNA control [-] or siRNA against KRAS [+]. Expression was normalized to  $\beta$ -actin mRNA.

**Supplemental Figure 2.** Quantitative PCR analysis of *ELK1* and *GAPDH* expression in Panc-1 cells transfected with control siRNAs (siCon) or siRNA targeting GAPDH (si*GAPDH*) or ELK1 (si*ELK1*). Expression was normalized to  $\beta$ -actin mRNA.

**Supplemental Figure 3.** Comparison of endogenous miR-31 expression in HNPE-KRAS cells to the indicated PDAC cells lines infected with MSCV-empty vector (EV) or MSCV-miR-31 (miR-31). MiR-31 was detected by Taqman qPCR and normalized to U6 snRNA.

**Supplemental Figure 4.** (A) Growth rates of BxPc3, Capan-1 and MiaPaCa2 cell lines infected with MSCV-empty vector (EV) or MSCV-miR-31 (miR-31) monitored over the indicated time course. Rate of growth measured by MTT assay (BxPc3) or percent confluency (Capan-1 and MiaPaCa2). (B) Western blot analysis of lysates from non-stimulated [-] or FBS stimulated [+] MiaPaCa2 and Capan-1 cell lines stably transfected with MSCV-empty vector (EV) or MSCV-miR-31 (miR-31). pERK and ERK indicate phosphorylated and total ERK. pAKT and AKT indicate phosphorylated and total AKT, respectively.

**Supplemental Figure 5.** Western blot analysis of RASA1 expression in isogenic HCT116 cells. Tubulin served as a protein loading control.

**Supplemental Figure 6.** (A) Western blot analysis of lysates from non-stimulated [-] or FBS stimulated [+] MiaPaCa2 and Capan-1 cell lines transfected with control siRNA (siCon) or siRNA

targeting *RASA1* (*siRASA1*). pERK and ERK indicate phosphorylated and total ERK. pAKT and AKT indicate phosphorylated and total AKT, respectively. (B) Western blot analysis of flag-*RASA1* expression in Panc-1 cells transfected with CMV-empty vector (EV) or CMV-flag-*RASA1* (*RASA1*). Tubulin served as a protein loading control.

**Supplemental Tables:**

**Supplemental Table 1:** Primer sequences. A list of all primers used in the study and their respective applications.

**Supplemental Table 2:** ConSite analysis of transcription factor binding elements in the miR-31 promoter. Shown is a list of TF binding elements within the miR-31 proximal promoter. Transcription factors were analyzed for known involvement in KRAS-MAPK pathway.

**Supplemental Table 3:** Analysis of potential miR-31 target genes. Shown are the 18 target genes from the intersection of 4 prediction algorithms and the representative number of conserved and non-conserved miR-31 binding sites (from Targetscan).

**Supplemental Table 4:** Literature analysis of miR-31 invasion-migration publications.

Supplemental Figure 1

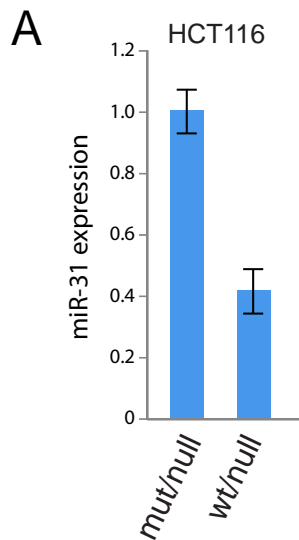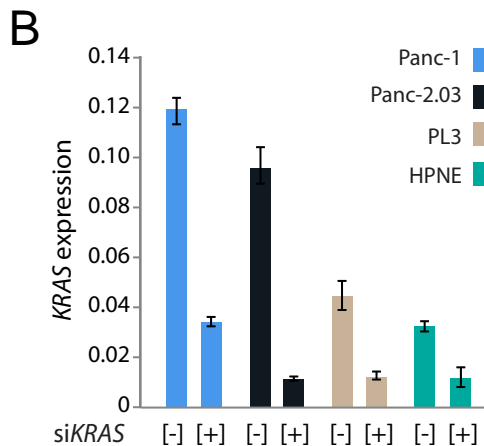

Supplemental Figure 2

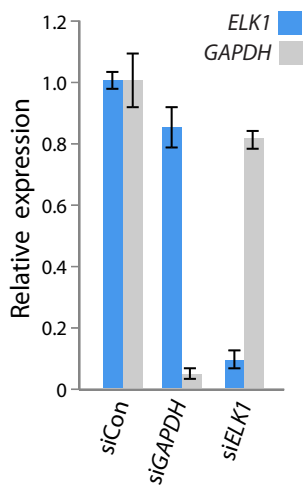

Supplemental Figure 3

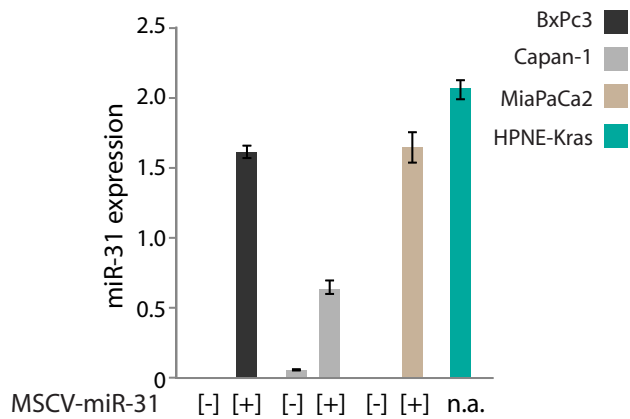

Supplemental Figure 4

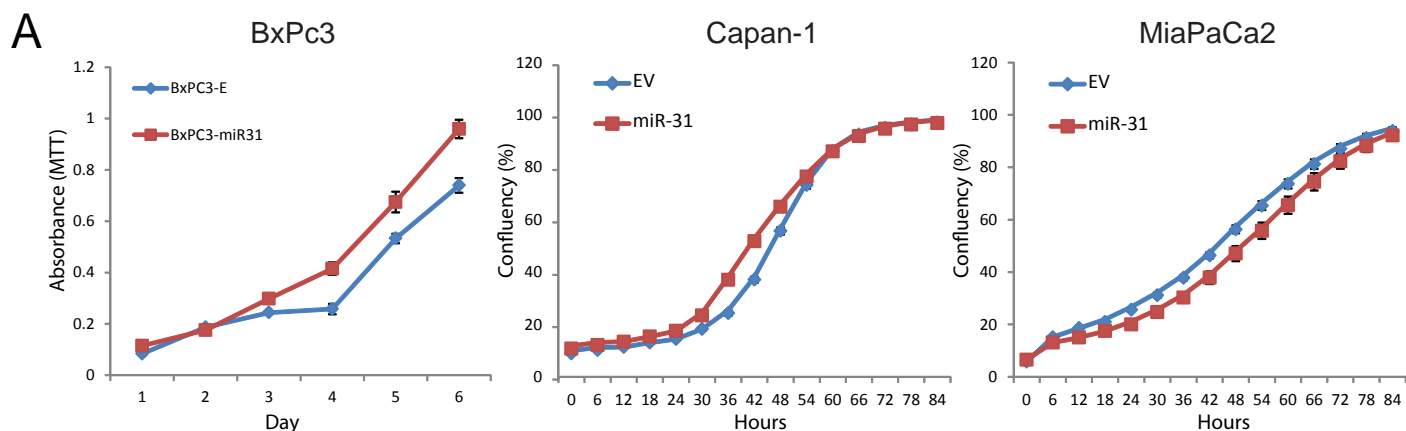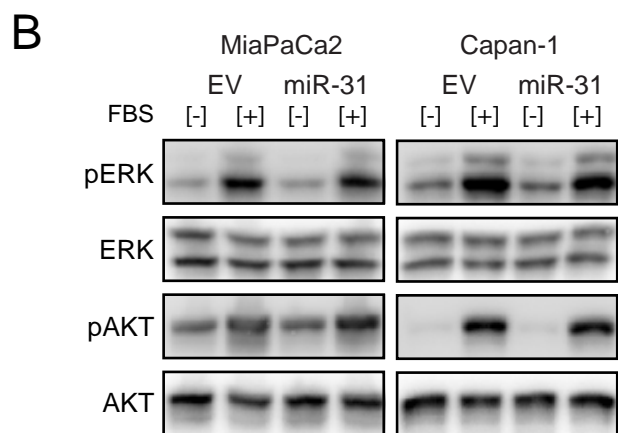

Supplemental Figure 5

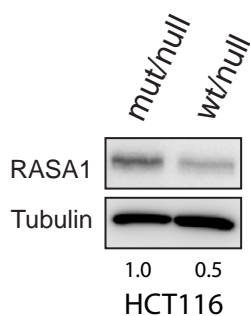

Supplemental Figure 6

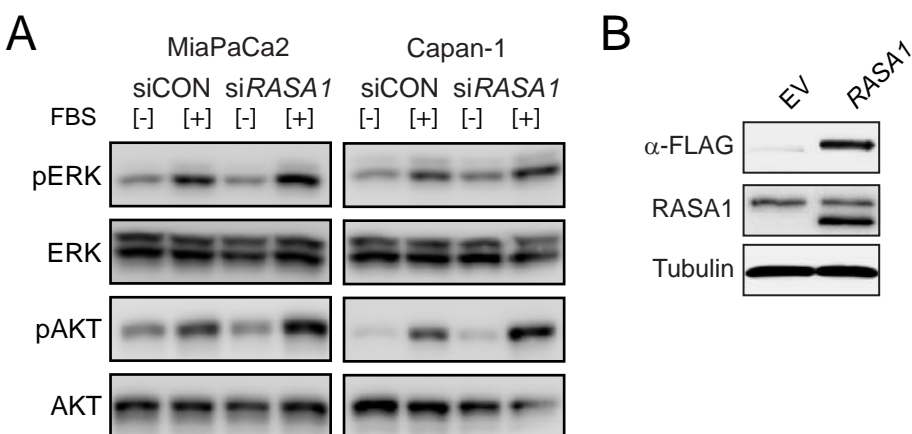

**Supplemental Table 1: Primer sequences**

| Application   | Target                          | FW / RV                                                     |
|---------------|---------------------------------|-------------------------------------------------------------|
| QPCR          | B-actin                         | AGGCACCAGGGCGTGAT                                           |
|               |                                 | GCCCACATAGGAATCCTTCTGAC                                     |
|               | ELK1                            | AATTCAAGCTGGTGGATGC                                         |
|               |                                 | TAACAGACACCTCTGGCTG                                         |
|               | GAPDH                           | AATCCCATCACCATCTTCCA                                        |
|               |                                 | TGGACTCCACGACGTACTCA.                                       |
|               | KRAS                            | CATGGACTGTGTCCCCACG                                         |
|               |                                 | TGACTAACCAATGCATGACAACACT                                   |
|               | MIR31HG                         | CCGAGTAGGAGGACAGAAGC                                        |
|               |                                 | GAGGCGGTGTTCCGTGAG                                          |
| RASA1         | GGCGTTCCTCTGCTATCGTT            |                                                             |
|               | TGGACCAGAATACGAGGAGG            |                                                             |
| ChiP amplicon | miR-31-promoter up              | CTCCATACTGCAAACCAGCA                                        |
|               |                                 | GTGAGAAGGCAGTCCAGGAA                                        |
|               | miR-31-promoter down            | AAGTAAACGACAGCTAGGAATCA                                     |
|               |                                 | GGCAGTCATATGGTTTGAGATTT                                     |
| Cloning       | miR-31 promoter TSS             | GGAGCTTCTCGAGTCAGAG                                         |
|               |                                 | ACTTCCGCTGTTCAATTTGC                                        |
|               | miR-31 pre-miRNA                | AGCCTCGAGTACCCACAAACCTCCTGTGC                               |
|               |                                 | AGCCTCGAGTGTGGCTAGCATGGAGTGAA                               |
|               | RASA1 3'UTR                     | CTAGTCTAGACTGCATGGATTCAGCATGTC                              |
|               |                                 | CTAGTCTAGATTCGTTTTGTGAAAGGTGGTC                             |
|               | Mutageneis UTR                  | CACTTCAGTTTAATGTCTCCTTTGCTGTAGGCTAAAAATAGCACACTTTTCCACATTCC |
|               |                                 | GGAATGTGAAAAGTGTGCTATTTTTAGCCTACAGCAAAGGAGACATTAAACTGAAGTG  |
|               | HG-2 promoter                   | GCGGAGATCTGGTGTGCGACTGCCGTGTG                               |
|               |                                 | GCGGCTAGCTGGGAGTTCATAAATCAACCTG                             |
| HG-3 promoter | GCGGAGATCTGGTGTGCGACTGCCGTGTG   |                                                             |
|               | GCGGCTAGCGAGAGAGGCCACTCCAGATG   |                                                             |
| HG-4 promoter | GCGGAGATCTTATCCTCAACCCTCCGTGTC  |                                                             |
|               | GCGGCTAGCTGGGAGTTCATAAATCAACCTG |                                                             |
| HG-7 promoter | GCGGAGATCTGGTGTGCGACTGCCGTGTG   |                                                             |
|               | GCGGCTAGCCTTCCCTCCCCTCCTTT      |                                                             |
| HG-9 promoter | GCGGAGATCTAAGAGGCGCCTGGACG      |                                                             |
|               | GCGGCTAGCGAGAGAGGCCACTCCAGATG   |                                                             |

**Supplemental Table 2: Consite analysis of transcription factor binding elements in the miR-31 promoter.**

| Transcription factor | Sequence    | From | To  | Score   | Strand | Known Pathway    |
|----------------------|-------------|------|-----|---------|--------|------------------|
| AML-1                | TTTGCGGGT   | 168  | 176 | 8.12 +  |        | u                |
| AP2alpha             | GCCTGGACG   | 18   | 26  | 6.203 + |        | u                |
| AP2alpha             | CCCTGGGC    | 58   | 66  | 8.599 - |        |                  |
| AP2alpha             | GCCCCGACG   | 65   | 73  | 6.793 + |        |                  |
| AP2alpha             | GCTTTTGGC   | 149  | 157 | 6.288 - |        |                  |
| AP2alpha             | GCCCCGTGG   | 345  | 353 | 7.587 + |        |                  |
| E2F                  | TTTGGCAC    | 152  | 159 | 8.832 + |        | ErbB/HER         |
| Elk-1                | GGCCCCGACG  | 64   | 73  | 8.131 + |        | MAPK/P38/TCF/SRF |
| Elk-1                | ACAGCGGAAG  | 273  | 282 | 7.333 + |        |                  |
| FREAC-3              | TACGCTCG    | 142  | 149 | 5.723 - |        | WNT              |
| FREAC-3              | GCACAGTA    | 156  | 163 | 6.501 + |        |                  |
| FREAC-3              | TACTCTCC    | 243  | 250 | 6.986 - |        |                  |
| FREAC-3              | CGGAAGTA    | 277  | 284 | 6.624 + |        |                  |
| FREAC-3              | TACTTCCT    | 283  | 290 | 6.624 - |        |                  |
| GATA-2               | TATCA       | 337  | 341 | 5.778 - |        | u                |
| GATA-2               | CATCT       | 388  | 392 | 5.559 - |        |                  |
| GATA-2               | TATCC       | 409  | 413 | 6.651 - |        |                  |
| GATA-3               | CTATCA      | 336  | 341 | 8.092 - |        | u                |
| GATA-3               | CCATCT      | 387  | 392 | 5.612 - |        |                  |
| GATA-3               | CTCTCT      | 401  | 406 | 5.286 - |        |                  |
| GATA-3               | CTATCC      | 408  | 413 | 6.215 - |        |                  |
| Max                  | GGCCCCGTGG  | 344  | 353 | 8.798 + |        | P38              |
| Max                  | CCCCGTGGTA  | 346  | 355 | 8.251 - |        |                  |
| Myc-Max              | GGCCCCGTGGT | 344  | 354 | 9.956 + |        |                  |
| MZF_1-4              | GGGGGA      | 2    | 7   | 8.252 + |        | u                |
| MZF_1-4              | TGGGGG      | 123  | 128 | 6.469 + |        |                  |
| MZF_1-4              | GGGGGA      | 124  | 129 | 8.252 + |        |                  |
| MZF_1-4              | TCCTCA      | 411  | 416 | 6.469 - |        |                  |
| MZF_5-13             | TGTGGGGGAA  | 121  | 130 | 7.301 + |        | u                |
| SAP-1                | AGCGGAAGT   | 275  | 283 | 10.27 + |        | MAPK/P38/TCF/SRF |
| SPI-1                | GGGAAG      | 8    | 13  | 8.579 + |        | MAPK             |
| SPI-1                | CGGAAT      | 113  | 118 | 5.504 + |        |                  |
| SPI-1                | GGGAAG      | 126  | 131 | 8.579 + |        |                  |
| SPI-1                | CTTCTC      | 182  | 187 | 5.496 - |        |                  |
| SPI-1                | CGGAAG      | 277  | 282 | 8.711 + |        |                  |
| SPI-1                | CTTCCT      | 285  | 290 | 8.184 - |        |                  |
| SPI-B                | AGCGGAA     | 275  | 281 | 9.933 + |        |                  |
| Thing1-E47           | TAAGTGGCAT  | 356  | 365 | 8.885 + |        | WNT              |
| Thing1-E47           | CATCTGGAGT  | 388  | 397 | 9.404 + |        |                  |
| USF                  | CCCCGTG     | 346  | 352 | 7.859 - |        | u                |
| Yin-Yang             | TCCATC      | 386  | 391 | 7.389 + |        | u                |

**Notes:**

u = unknown

**Supplemental Table 3: Analysis of potential miR-31 target genes**

| GENE    | Gene name                                                                     | Conserved sites |                              |
|---------|-------------------------------------------------------------------------------|-----------------|------------------------------|
|         |                                                                               | total           | Poorly conserved sites total |
| AKAP7   | A kinase (PRKA) anchor protein 7                                              | 0               | 3                            |
| CAMK2D  | calcium/calmodulin-dependent protein kinase (CaM kinase) II delta             | 1               | 0                            |
| DCBLD2  | discoidin, CUB and LCCL domain containing 2                                   | 1               | 1                            |
| HIAT1   | hippocampus abundant transcript 1                                             | 1               | 0                            |
| HIF1AN  | hypoxia-inducible factor 1, alpha subunit inhibitor                           | 1               | 3                            |
| KHDRBS3 | KH domain containing, RNA binding, signal transduction associated 3           | 1               | 0                            |
| NUMB    | numb homolog (Drosophila)                                                     | 1               | 0                            |
| PEX5    | peroxisomal biogenesis factor 5                                               | 1               | 1                            |
| RASA1   | RAS p21 protein activator (GTPase activating protein) 1                       | 1               | 0                            |
| RGS4    | regulator of G-protein signaling 4                                            | 1               | 2                            |
| RHOBTB1 | Rho-related BTB domain containing 1                                           | 1               | 1                            |
| RSBN1   | round spermatid basic protein 1                                               | 2               | 3                            |
| SH2D1A  | SH2 domain protein 1A, Duncan's disease (lymphoproliferative syndrome)        | 2               | 0                            |
| SLC1A2  | solute carrier family 1 (glial high affinity glutamate transporter), member 2 | 2               | 2                            |
| SLC6A6  | solute carrier family 6 (neurotransmitter transporter, taurine), member 6     | 1               | 1                            |
| STX12   | syntaxin 12                                                                   | 1               | 0                            |
| TESK2   | testis-specific kinase 2                                                      | 1               | 1                            |
| TFRC    | transferrin receptor (p90, CD71)                                              | 1               | 0                            |

**Supplemental Table 4: Literature analysis of miR-31 invasion-migration publications**

| Publication: | Cancer type:                         | miR-31 expression: | Invasion migration phenotype: | Validated miR-31 target(s):     | Functional studies: | Reference:                                    |
|--------------|--------------------------------------|--------------------|-------------------------------|---------------------------------|---------------------|-----------------------------------------------|
| 1            | Ovarian (Serous epithelial)          | dn                 | decreased                     | AF4/FMR2                        | PCMI                | Ibrahim et al., J Ovarian Res., 2015          |
| 2            | Cervical                             | up                 | enhanced                      | n/a                             | PMI                 | Zheng et al., Arch Gynecol Obstet. 2015       |
| 3            | Esophageal                           | dn                 | decreased                     | n/a                             | PMI                 | Koumangoye et al., Mol Cancer 2015            |
| 4            | Breast                               | dn                 | decreased                     | n/a                             | MI                  | Ben-chetrit et al., Sci Signal 2015           |
| 5            | (Chinese)                            |                    |                               |                                 |                     |                                               |
| 6            | Cutaneous squamous cell carcinoma    | up                 | increased                     | n/a                             | CIM                 | Wang et al., PLoS One 2014                    |
| 7            | Cervical                             | up                 | increased                     | ARID1A                          | PCMI                | Wang et al., Gynecol Oncol 2014               |
| 8            | Breast                               | dn                 | decreased                     | EMSY                            | PMI                 | Vire et al., Mol Cell 2014                    |
| 9            | Colon                                | n/a                | increased                     | HIF1A/FIH1                      | PMI                 | Chen et al., 2014                             |
| 10           | Colon                                | up                 | increased                     | SATB2                           | PMI                 | Yang et al., PLoS One 2013                    |
| 11           | Lung adenocarcinoma                  | up                 | increased                     | n/a                             | PMI                 | Meng et al., 2013                             |
| 12           | Breast                               | dn                 | decreased                     | PKC epsilon                     | A                   | Korner et al., J Biol Chem, 2013              |
| 13           | C.A.F. (not included)                |                    |                               |                                 |                     |                                               |
| 14           | Melanoma                             | dn                 | decreased                     | SRC, MET, MAP3K14, RAB27A, EZH2 | n/a                 | Asangani et al., Oncotarget 2012              |
| 15           | Prostate                             | dn                 | decreased                     | examined putative targets only  | PMI                 | Fuse et al., J Hun Genet. 2012                |
| 16           | Cutaneous squamous cell carcinoma    | up                 | *                             | *focused on miR-125b            |                     | Xu et al., J Biol Chem 2012                   |
| 17           | Oral leukoplakia                     | up (miR-31*)       | increased                     | FGF3                            | PCMIA               | Xiao et al., PLoS One 2012                    |
| 18           | Ovarian                              | n/a                | increased                     | TIAM1                           | PMI                 | Li et al., Oncol Rep 2012                     |
| 19           | Pancreatic                           | on/off             | both                          | n/a                             | PMI                 | Laurila et al., Genes Chromosomes Cancer 2012 |
| 20           | Oral                                 | dn                 | *                             | *focused on miR-10b             |                     | Lu et al., Cancer Prev Res (Phila) 2012       |
| 21           | Glioma                               | dn                 | decreased                     | n/a                             | MI                  | Hua et al., Oncol Rep 2012                    |
| 22           | Esophageal (squamous cell carcinoma) | up                 | increased                     | EMP1, KSR2, RGS4                | CMI                 | Zhang et al., Clin Sci (Lond) 2011            |
| 23           | Colon                                | n/a                | decreased                     | n/a                             | CMI                 | Wang et al., BMC Cancer 2010                  |
| 24           | C.A.F. (not included)                |                    |                               |                                 |                     |                                               |
| 25           | Colon                                | up                 | increased                     | TIAM1                           | MI                  | Cottonham et al., J Biol Chem 2010            |
| 26           | Mesothelioma                         | dn                 | decreased                     | PPP6C                           | PCMI                | Ivanov et al., J Biol Chem 2010               |
| 27           | Kaposi's sarcoma                     | up                 | increased                     | n/a                             | MI                  | Tsai et al., J Virol 2009                     |

**Notes:**

- n/a Not analyzed
- P Proliferation growth assay
- C Clonogenicity/colony assay
- M Migration
- I Invasion
- A Apoptosis



## **Supplemental Materials:**

**Antibodies used:** Antibodies were obtained from Cell Signaling Technologies (AKT: 9272; pAKT:4060; ERK: 9102; pERK: 9101; GAPDH: 2118; RHO: 2117), Santa Cruz (ELK1: sc-22804X; RASA1: sc-063; Tubulin: sc-69969) and Sigma (Flag-M2: F3165).
